# Supplementary material
Source: PubMed Central journal article supplement (PMC2851913)
Supplement: 0913856107_pnas.200913856SI.pdf [file 0913856107_pnas.200913856SI.pdf]

# Supporting Information

Martínez et al. 10.1073/pnas.0913856107

## SI Text

**ESR-US Combined Dating Method Applied on Two Horse Fossil Teeth from Vallparadis Site.** The ESR-US combined dating method (1) was applied on two equid teeth samples, which were taken from the collections in 2006. The sampling area was focused on the vestibular face of the teeth, where the dental tissues (cement, enamel, and dentine) were separated mechanically. Isotopic analysis was performed by alpha-ray spectrometry, according to the standard procedure described in Bischoff et al. (2) to get U-series data.

A part of the enamel, after the cleaning of its surface on both sides (inner and outer) to eliminate the effect of external alpha contribution, was ground and sieved. The granulometric fraction 100–200  $\mu\text{m}$  was split into several aliquots. Enamel aliquots were then irradiated with a calibrated  $^{60}\text{Co}$   $\gamma$  source, using 15 irradiation steps with an exponential dose distribution: 0, 100, 160, 250, 400, 630, 1,000, 1,600, 2,200, 3,600, 5,600, 8,900, 12,600, 16,000, and 20,000 Gy.

ESR measurements were carried out at the Muséum National d'Histoire Naturelle (Paris) with an EMX Bruker spectrometer (X band) at room temperature cavity with the following acquisition parameters: 1 mW microwave power, 1,024 points resolution, 12 mT sweep width, 100 kHz modulation frequency, 0.1 mT modulation amplitude, 20 ms conversion time, and 5 ms time constant. Each 15 aliquots set was measured three times at different days to check data reproducibility. The ESR intensities

were extracted from peak-to-peak amplitudes (T1-B2) of the ESR signal of enamel (1).

The equivalent dose ( $D_E$ ) and error associated were calculated with a noncommercial GW-Basic program (3), by fitting a single exponential function through the experimental data points. No ponderation was taken into account with applied dose, but accuracy on  $D_E$  value was constrained by the nonirradiated aliquot.

ESR-US combined age calculations were carried out with the DATA program (4) using the following sample geometry: dentine/enamel/cement. The alpha efficiency used is  $0.13 \pm 0.02$  (5) and Monte-Carlo beta attenuation factors based on the thickness of the tooth enamel and outer layers removed. The water content was estimated to be  $3 \pm 1$  wt% in the enamel,  $5 \pm 3$  wt% in the dentine and cementum, and  $15 \pm 5$  wt% in the sediment, the latter one based on the dried weight. The effect of Ra and Rn loss in each tissue was determined by combining alpha-ray and gamma-ray data (6). Gamma-ray spectrometry was used to determine the radioisotope (U, Th, and K) contents of sediments which were taken in situ (3). The dose-rate conversion was calculated according to factors from Adamiec and Aitken (7). Additional in situ gamma dose rate was assessed by placing two TL dosimeters ( $\text{CaSO}_4:\text{Dy}$ ) in level 10 for 10 months. Cosmic component was calculated from Prescott and Hutton (8, 9). The error associated to age corresponds to the quadratic sum of the equivalent and annual dose-rate errors.

1. Grün R (1998) Reproducibility measurements for ESR signal intensity and dose determination: High precision but doubtful accuracy. *Radiat Meas* 29:177–193.
2. Bischoff J, Rosenbauer R, Tavoso A, de Lumley H (1988) A test of Uranium-Series dating of fossil tooth enamel: Results from Tournal cave, France. *Appl Geochem* 3:135–141.
3. Yokoyama Y, Nguyen HV (1980) *Isotope Marine Chemistry*, eds Goldberg ED et al. (Uchida Rokakuho, Tokyo), pp 259–289.
4. Grün R (2009) The DATA program for the calculation of ESR age estimates on tooth enamel. *Quat Geochronol* 4:231–232.
5. Grün R, Katzenberger-Apel O (1994) An alpha irradiator for ESR dating. *Ancient TL* 12:5–38.
6. Bahain JJ, Yokoyama Y, Falguères Ch, Sarcia MN (1992) ESR dating of tooth enamel: A comparison with K-Ar dating. *Quat Sci Rev* 11:245–250.
7. Adamiec G, Aitken MJ (1998) Dose-rate conversion factors: Update. *Ancient TL* 16: 37–50.
8. Prescott JR, Hutton JT (1988) Cosmic ray and gamma ray dosimetry for TL and ESR. *Nucl Tracks Radiat Meas* 14:223–227.
9. Prescott JR, Hutton JT (1994) Cosmic ray contributions to dose rates for luminescence and ESR dating: Large depths and long-term time variations. *Radiat Meas* 23: 497–500.

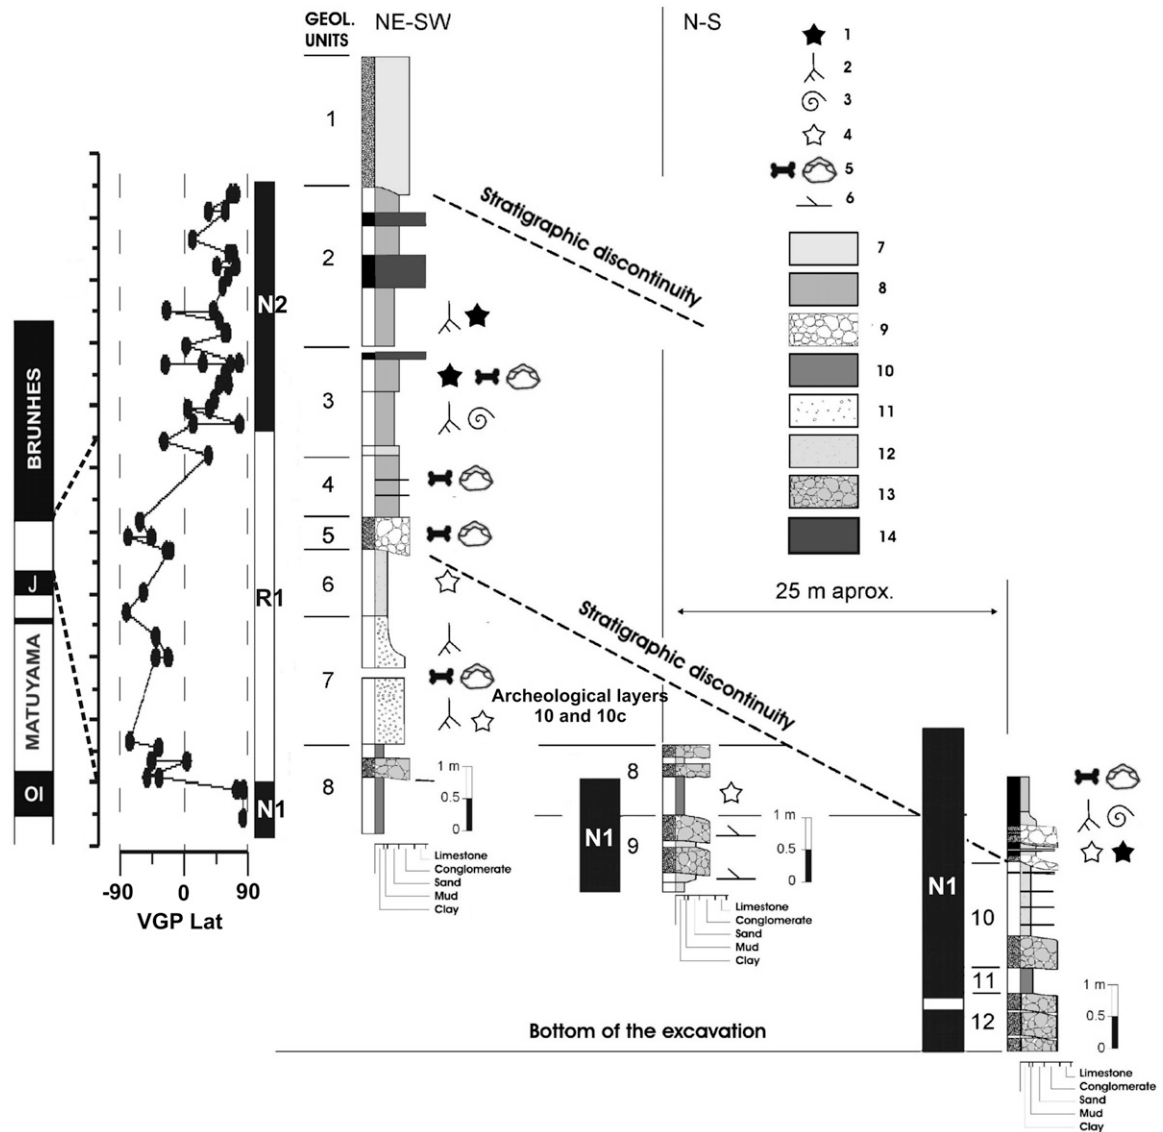

**Fig. S1.** Geological context: Summary of the lithostratigraphy and chronology of the Quaternary sedimentation at the Vallparadis site. The synthetic column shows the different stratigraphic units to the *Right* and the magnetostratigraphy column to the *Left*. (1) Organic material and fossil wood remains, (2) root marks, (3) gastropod remains, (4) CaCO<sub>3</sub> remains, (5) units bearing archeological remains, (6) cross-lamination, (7) Upper Pleistocene terrace, (8) clays and muds with gastropods, (9) unit 5, (10) red clays and muds, (11) unit 7, (12) brown clays and muds, (13) conglomerates, and (14) paleo-floor.

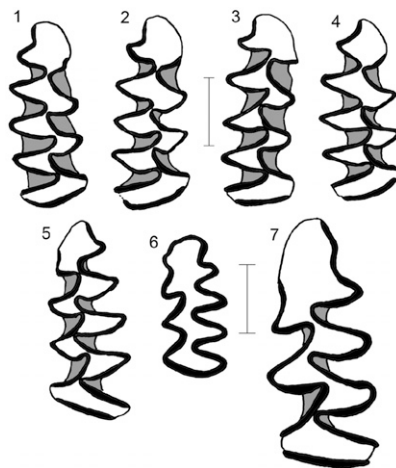

**Fig. S2.** Occlusal surface of micromammal molars from layer 10 (unit 7). (1) *Iberomys* aff. *huescarensis*, left lower M<sub>1</sub>; (2) *Iberomys* aff. *huescarensis*, left lower M<sub>1</sub>; (3) *Iberomys* aff. *huescarensis*, left lower M<sub>1</sub>; (4) *Iberomys* aff. *huescarensis*, left lower M<sub>1</sub>; (5) *Iberomys* aff. *huescarensis*, right lower M<sub>1</sub>; (6) *Ungaromys nanus*, right lower M<sub>1</sub>; and (7) *Mimomys savini*, right lower M<sub>1</sub>. (Scale bar: 1 mm.) (Drawings by J. M. López)

**Table S1. U-series data measured in fossil horse teeth from Vallparadis site**

| Sample  | Tissue | U (ppm)        | <sup>234</sup> U/ <sup>238</sup> U | <sup>230</sup> Th/ <sup>234</sup> U | <sup>222</sup> Rn/ <sup>230</sup> Th | T enam.* (μm) | T rem.† (μm) |
|---------|--------|----------------|------------------------------------|-------------------------------------|--------------------------------------|---------------|--------------|
| EVT0601 | C      | 27.400 ± 0.082 | 2.102 ± 0.050                      | 1.084 ± 0.036                       | 0.21 ± 0.05                          |               | (2) 80 ± 10  |
|         | D      | 105.95 ± 1.980 | 2.030 ± 0.026                      | 0.991 ± 0.023                       | 0.44 ± 0.10                          |               | (1) 90 ± 11  |
|         | E      | 2.350 ± 0.070  | 1.801 ± 0.039                      | 0.997 ± 0.032                       | 1.00 ± 0.05                          | 1440 ± 180    |              |
| EVT0602 | C      | 36.220 ± 0.850 | 2.100 ± 0.035                      | 1.191 ± 0.035                       | 0.18 ± 0.05                          |               | (2) 40 ± 5   |
|         | D      | 90.850 ± 1.750 | 2.100 ± 0.027                      | 1.115 ± 0.029                       | 0.30 ± 0.10                          |               | (1) 60 ± 8   |
|         | E      | 4.150 ± 0.120  | 1.752 ± 0.034                      | 1.051 ± 0.036                       | 0.83 ± 0.08                          | 1510 ± 189    |              |

Statistical errors associated with isotopic ratios are 1 σ. (1) The inner side of the enamel, i.e., dentine side, and (2) the outer part of the enamel, cementum side.

\*Initial enamel thickness.

†Removed enamel thicknesses used for ESR-US age calculation.

**Table S2. Total dose-rate components calculated for the fossil horse teeth from Vallparadis site**

| Sample  | Depth (m) | α + β internal (μGy/a) | β dentine   | β cement  | γ sediments + cosmic (μGy/a) | Total dose-rate (μGy/a) |
|---------|-----------|------------------------|-------------|-----------|------------------------------|-------------------------|
| EVT0601 | 5 ± 2     | 1023 ± 56              | 662 ± 97    | 178 ± 26  | 1081 ± 59                    | 2943 ± 244              |
| EVT0602 | 5 ± 2     | 2676 ± 424*            | 1467 ± 215* | 619 ± 90* | 1081 ± 59                    | 5843 ± 488*             |

\*Values calculated considering an early-uptake model.

**Table S3. NISP, MNE, and MNI by taxa from Vallparadís site (sample analyzed)**

| Taxa             | NISP  | MNE   | MNI |
|------------------|-------|-------|-----|
| Elephantidae     | 40    | 20    | 2   |
| Hippopotamidae   | 506   | 302   | 13  |
| Rhinocerotidae   | 280   | 190   | 7   |
| Cervidae         | 451   | 220   | 27  |
| Equidae          | 286   | 198   | 10  |
| Bovidae          | 127   | 90    | 6   |
| Suidae           | 13    | 9     | 1   |
| Felidae          | 14    | 13    | 2   |
| Canidae          | 20    | 19    | 3   |
| Ursidae          | 84    | 55    | 3   |
| Hyaenidae        | 26    | 26    | 2   |
| Cercopithecidae  | 3     | 3     | 1   |
| Mustelidae       | 1     | 1     | 1   |
| Castoridae       | 2     | 2     | 1   |
| Hystriidae       | 2     | 2     | 1   |
| Leporidae        | 17    | 16    | 2   |
| Quelonia         | 18    | —     | 1   |
| Carnivora indet. | 59    | —     | —   |
| Total            | 1,949 | 1,166 | 83  |

NISP, number of identifiable specimens; MNE, minimum number of elements; MNI, minimum number of individuals.

**Table S4. NISP and MNE of taxa**

| NISP (MNE)      | 1       | 2      | 3        | 4        | 5        | 6     | 7      | 8      | 9      | 10     | 11     |
|-----------------|---------|--------|----------|----------|----------|-------|--------|--------|--------|--------|--------|
| Antler          | 4(2)    | —      | —        | —        | —        | —     | —      | —      | —      | —      | —      |
| Cranium         | 1(1)    | —      | 1(1)     | 21(9)    | —        | 1(1)  | 3(2)   | 11(4)  | 1(1)   | —      | —      |
| Teeth           | 45(34)  | 9(4)   | 182(107) | 280(155) | 196(124) | 11(7) | 6(6)   | 44(30) | 2(2)   | 12(11) | 3(3)   |
| Mandible        | 2(2)    | 1(1)   | 6(4)     | 9(7)     | 10(4)    | —     | —      | 10(4)  | 2(2)   | —      | 1(1)   |
| Scapula         | 2(2)    | —      | 2(2)     | 15(8)    | 3(3)     | —     | —      | 1(1)   | 1(1)   | —      | 1(1)   |
| Humerus         | 12(4)   | —      | 3(3)     | 22(14)   | 2(2)     | —     | 1(1)   | 5(5)   | 1(1)   | 2(2)   | —      |
| Radio           | 6(3)    | 1(1)   | 6(5)     | 2(2)     | 12(11)   | —     | —      | 3(2)   | 2(2)   | —      | 1(1)   |
| Ulna            | 2(2)    | —      | 2(1)     | 1(1)     | 12(10)   | —     | 1(1)   | 6(5)   | 1(1)   | —      | 2(2)   |
| Radio-ulna      | 2(2)    | —      | 5(4)     | 17(9)    | —        | —     | —      | —      | —      | —      | —      |
| Carpial         | 6(5)    | 1(1)   | 3(3)     | 6(6)     | 6(6)     | —     | —      | —      | —      | —      | —      |
| Vertebrae       | —       | 5(3)   | —        | 21(18)   | —        | —     | —      | —      | 2(2)   | —      | —      |
| Ribs            | —       | —      | —        | 19(7)    | —        | —     | —      | —      | —      | —      | —      |
| Metacarpial     | 3(2)    | —      | 17(17)   | 1(1)     | 2(2)     | —     | —      | —      | 5(5)   | —      | —      |
| Coxal           | 1(1)    | —      | —        | 1(1)     | —        | —     | —      | —      | —      | —      | —      |
| Pelvis          | —       | —      | 3(2)     | 4(3)     | 9(8)     | —     | —      | —      | —      | —      | 1(1)   |
| Femur           | 2(1)    | 1(1)   | 1(1)     | 25(9)    | 12(6)    | —     | —      | —      | 1(1)   | —      | —      |
| Patella         | —       | —      | —        | 2(2)     | —        | —     | —      | —      | —      | —      | —      |
| Tibia           | 10(6)   | 5(3)   | 12(11)   | 19(14)   | 5(4)     | —     | 1(1)   | —      | 1(1)   | 2(2)   | 1(1)   |
| Fibula          | —       | —      | —        | 2(2)     | 2(1)     | —     | —      | 1(1)   | —      | —      | —      |
| Tarsal          | 12(12)  | 2(2)   | 9(9)     | 26(24)   | 3(3)     | 1(1)  | —      | —      | 2(2)   | 1(1)   | 4(3)   |
| Metatarsal      | 10(5)   | —      | 19(19)   | 6(6)     | 1(1)     | —     | 2(2)   | —      | 3(3)   | 1(1)   | —      |
| Metapodial      | 1       | —      | 6(-)     | 2(-)     | 2(2)     | —     | —      | —      | 1(1)   | —      | —      |
| Phalange        | —       | —      | —        | —        | —        | —     | —      | —      | —      | 1(1)   | —      |
| 1 Phalange      | 4(4)    | —      | 5(5)     | 2(2)     | —        | —     | —      | 3(3)   | —      | 1(1)   | 2(2)   |
| 2 Phalange      | —       | —      | 3(3)     | 1(1)     | 3(3)     | —     | —      | —      | —      | —      | —      |
| 3 Phalange      | —       | —      | —        | —        | —        | —     | —      | —      | 1(1)   | —      | 1(1)   |
| 4 Phalange      | —       | —      | —        | —        | —        | —     | —      | —      | —      | —      | —      |
| Carpial/tarsal  | 2(2)    | 8(4)   | 1(1)     | 2(1)     | —        | —     | —      | —      | —      | —      | —      |
| Flat bone       | —       | 1(-)   | —        | —        | —        | —     | —      | —      | —      | —      | —      |
| Limb bone shaft | —       | 6(-)   | —        | —        | —        | —     | —      | —      | —      | —      | —      |
| Total           | 127(90) | 40(20) | 286(198) | 506(302) | 280(190) | 13(9) | 14(13) | 84(55) | 26(26) | 20(19) | 17(16) |

1, Bovidae; 2, Elephantidae; 3, Equidae; 4, Hippopotamidae; 5, Rhinocerotidae; 6, Suidae; 7, Felidae; 8, Ursidae; 9, Hyaenidae; 10, Canidae; 11, Leporidae (sample analyzed).

**Table S5. Distribution of raw material types according to artifact category**

|        | Hammerstones/anvils | Cores      | Retouched tools | Flakes      | Flakes fragments/debris | Total        |
|--------|---------------------|------------|-----------------|-------------|-------------------------|--------------|
| Quartz | —                   | 72 (4.2%)  | 211 (12.5%)     | 277 (16.4%) | 758 (44.9%)             | 1318 (78.1%) |
| Flint  | 1 (0.0%)            | 22 (1.3%)  | 80 (4.7%)       | 37 (2.1%)   | 52 (3%)                 | 192 (11.3%)  |
| Lydite | —                   | 11 (0.6%)  | 16 (0.9%)       | 31 (1.8%)   | 75 (4.4%)               | 133 (7.8%)   |
| Others | 6 (0.3%)            | 3 (0.1%)   | 15 (0.8%)       | 6 (0.3%)    | 13 (0.7%)               | 43 (2.5%)    |
| Total  | 7 (0.4%)            | 108 (6.4%) | 322 (19%)       | 351 (20.8%) | 898 (53.2%)             | 1686         |

Others include quartzite and metamorphic rock (sample analyzed).

**Table S6. Fossil remains with cut marks from layer 10**

| Element         | Side | Size           | Age | Cut marks | Action       |
|-----------------|------|----------------|-----|-----------|--------------|
| Femur           | R    | Ms             | A   | Incisions | Defleshing   |
| Humerus         | —    | Rhinocerotidae | A   | Incisions | Defleshing   |
| Femur           | L    | Hippopotamidae | A   | Incisions | Defleshing   |
| Humerus         | L    | Ms             | A   | Incisions | Defleshing   |
| Mandible        | —    | Rhinocerotidae | I   | Incisions | Defleshing   |
| Limb bone shaft | —    | Ms             | A   | Incisions | Defleshing   |
| Dorsal vertebra | —    | Ls             | A   | Incisions | Defleshing   |
| Humerus         | —    | Ms             | I   | Sawing    | Defleshing   |
| Calcaneus       | L    | Ms             | A   | Incisions | Defleshing   |
| Tibia           | R    | Rhinocerotidae | A   | Incisions | Defleshing   |
| Calcaneus       | R    | Ms             | A   | Incisions | Defleshing   |
| Metapod         | —    | Rhinocerotidae | A   | Chopping  | Dismembering |

Anatomical and side elements. Taxonomical identification or mammal size (large or medium size). Age of death (A, adult; I, infantile). Type of cut mark depending on the human action. Butchery action.
